# Supplementary material
Source: PubMed Central journal article supplement (PMC6599684)
Supplement: NIHMS1027257-supplement-Supplemental_Information.pdf [file NIHMS1027257-supplement-Supplemental_Information.pdf]

## Supporting Information

# A Cloud-Based Metabolite and Chemical Prioritization System for the Biology/Disease-driven Human Proteome Project

*Kun-Hsing Yu<sup>1,2</sup>, Tsung-Lu Michael Lee<sup>3</sup>, Yu-Ju Chen<sup>4</sup>, Christopher Ré<sup>5</sup>,  
Samuel C. Kou<sup>2</sup>, Jung-Hsien Chiang<sup>6,\*</sup>, Michael Snyder<sup>7,\*</sup>, Isaac S. Kohane<sup>1,\*</sup>*

<sup>1</sup> Department of Biomedical Informatics, Harvard Medical School

<sup>2</sup> Department of Statistics, Harvard University

<sup>3</sup> Department of Information Engineering, Kun Shan University, Taiwan

<sup>4</sup> Institute of Chemistry, Academia Sinica, Taiwan

<sup>5</sup> Department of Computer Science, Stanford University

<sup>6</sup> Department of Computer Science and Information Engineering, National Cheng Kung  
University, Taiwan

<sup>7</sup> Department of Genetics, Stanford University

### Table of Contents:

|                             |                                      |
|-----------------------------|--------------------------------------|
| SupplementalInformation.pdf | Figures S-1, S-2, and S-3, Table S-1 |
| SupplementalData1.xlsx      | Data S-1                             |
| SupplementalData2.xlsx      | Data S-2                             |

**Figure S-1.** Metscape visualized the pathways involved with the prioritized metabolites. Metabolites associated with cancers, diabetes, glycoproteomics and the musculoskeletal system are shown.

Figure S-1

Cancers

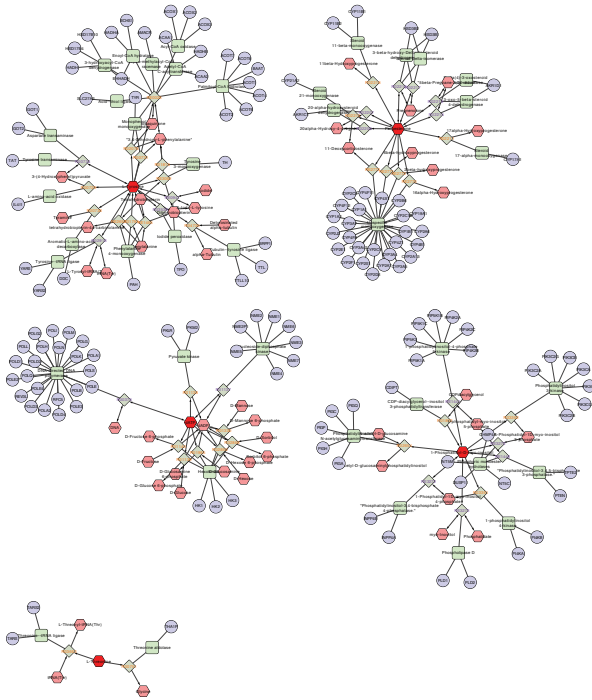

Diabetes

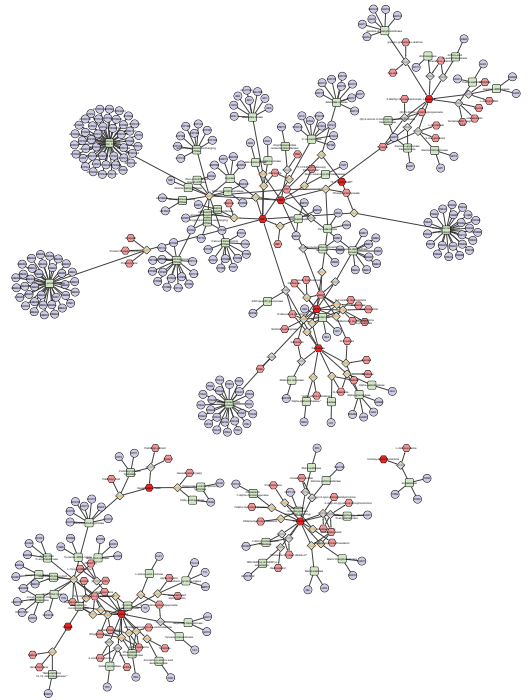

Glycoproteomics

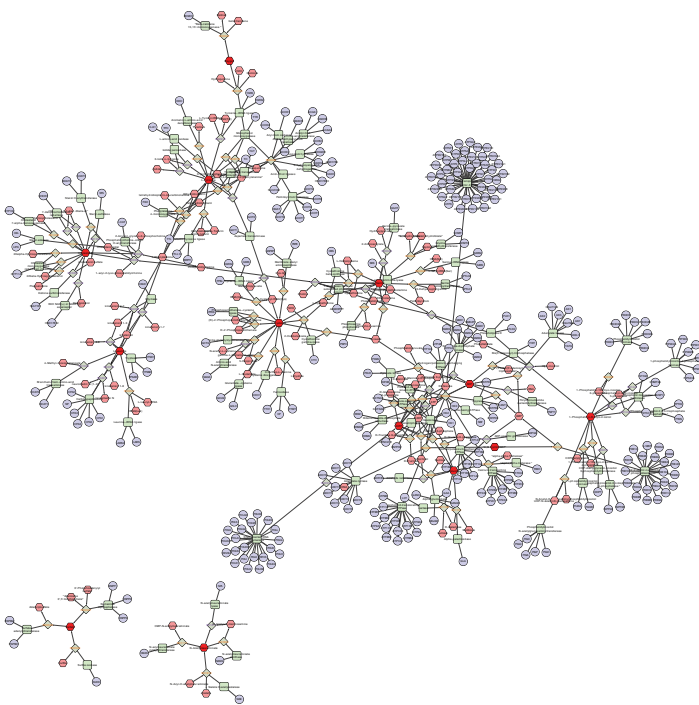

Musculoskeletal

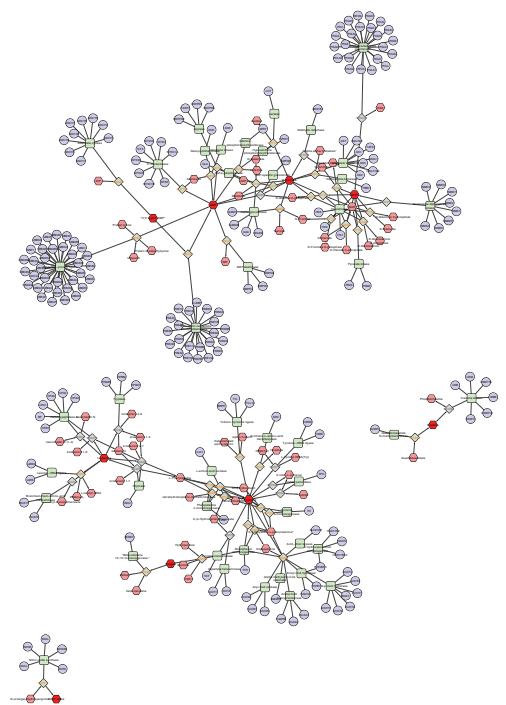

**Figure S-2.** The quantitative network statistics of the gene-metabolite interaction and gene-chemical interaction networks. (A) The centralization, efficiency, transitivity, and connectedness score of the gene-metabolite interaction networks. The gene-metabolite interaction networks of the four selected B/D-HPP targeted areas had high connectedness and moderate centralization, efficiency, and transitivity scores. (B) The centralization, efficiency, transitivity, and connectedness score of the gene-chemical interaction networks. Comparing with the gene-metabolite interaction networks, the gene-chemical interaction networks had slightly lower connectedness and centralization scores. The relative sparsity of the gene-chemical interaction networks contributed to the higher efficiency scores and varied transitivity scores.

Figure S-2

A

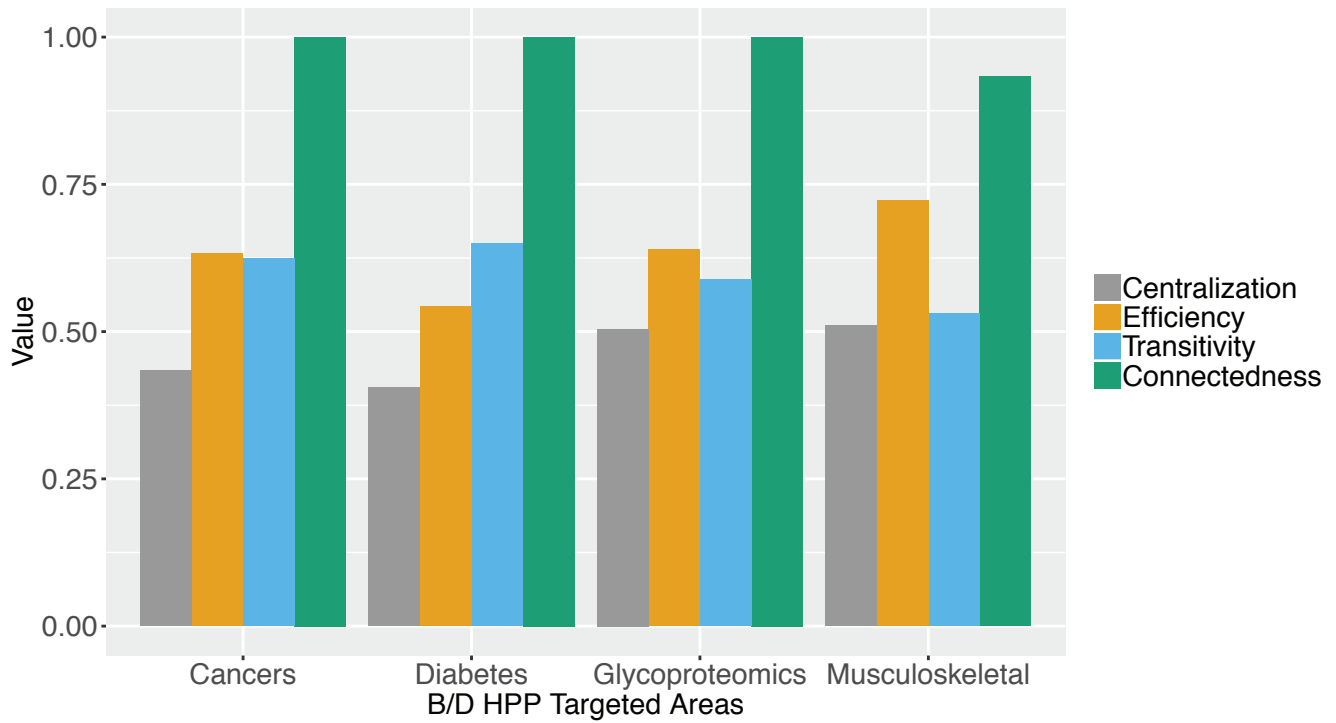

B

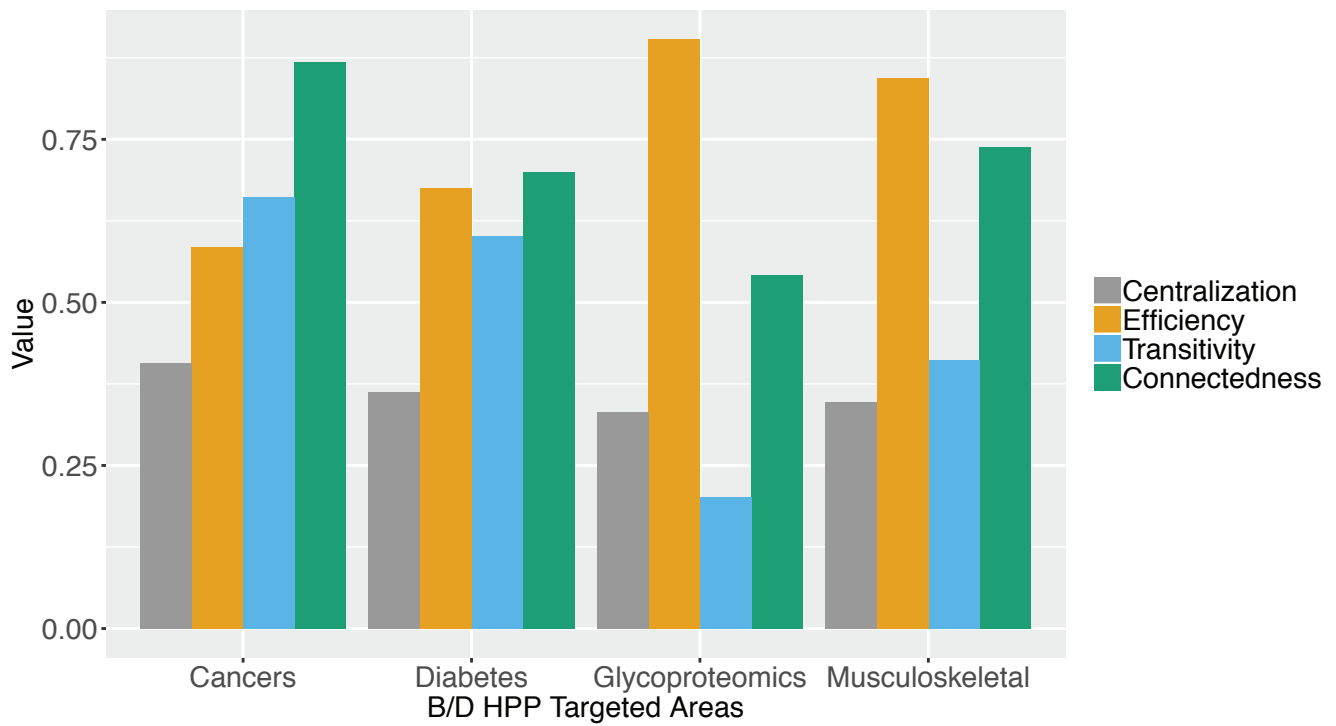

**Figure S-3.** Multidimensional scaling (MDS) visualization of the connections among B/D-HPP targeted fields and their associated chemicals. B/D-HPP fields with higher correlation in their associated chemicals' PURPOSE scores have shorter distances on the graph.

Figure S-3

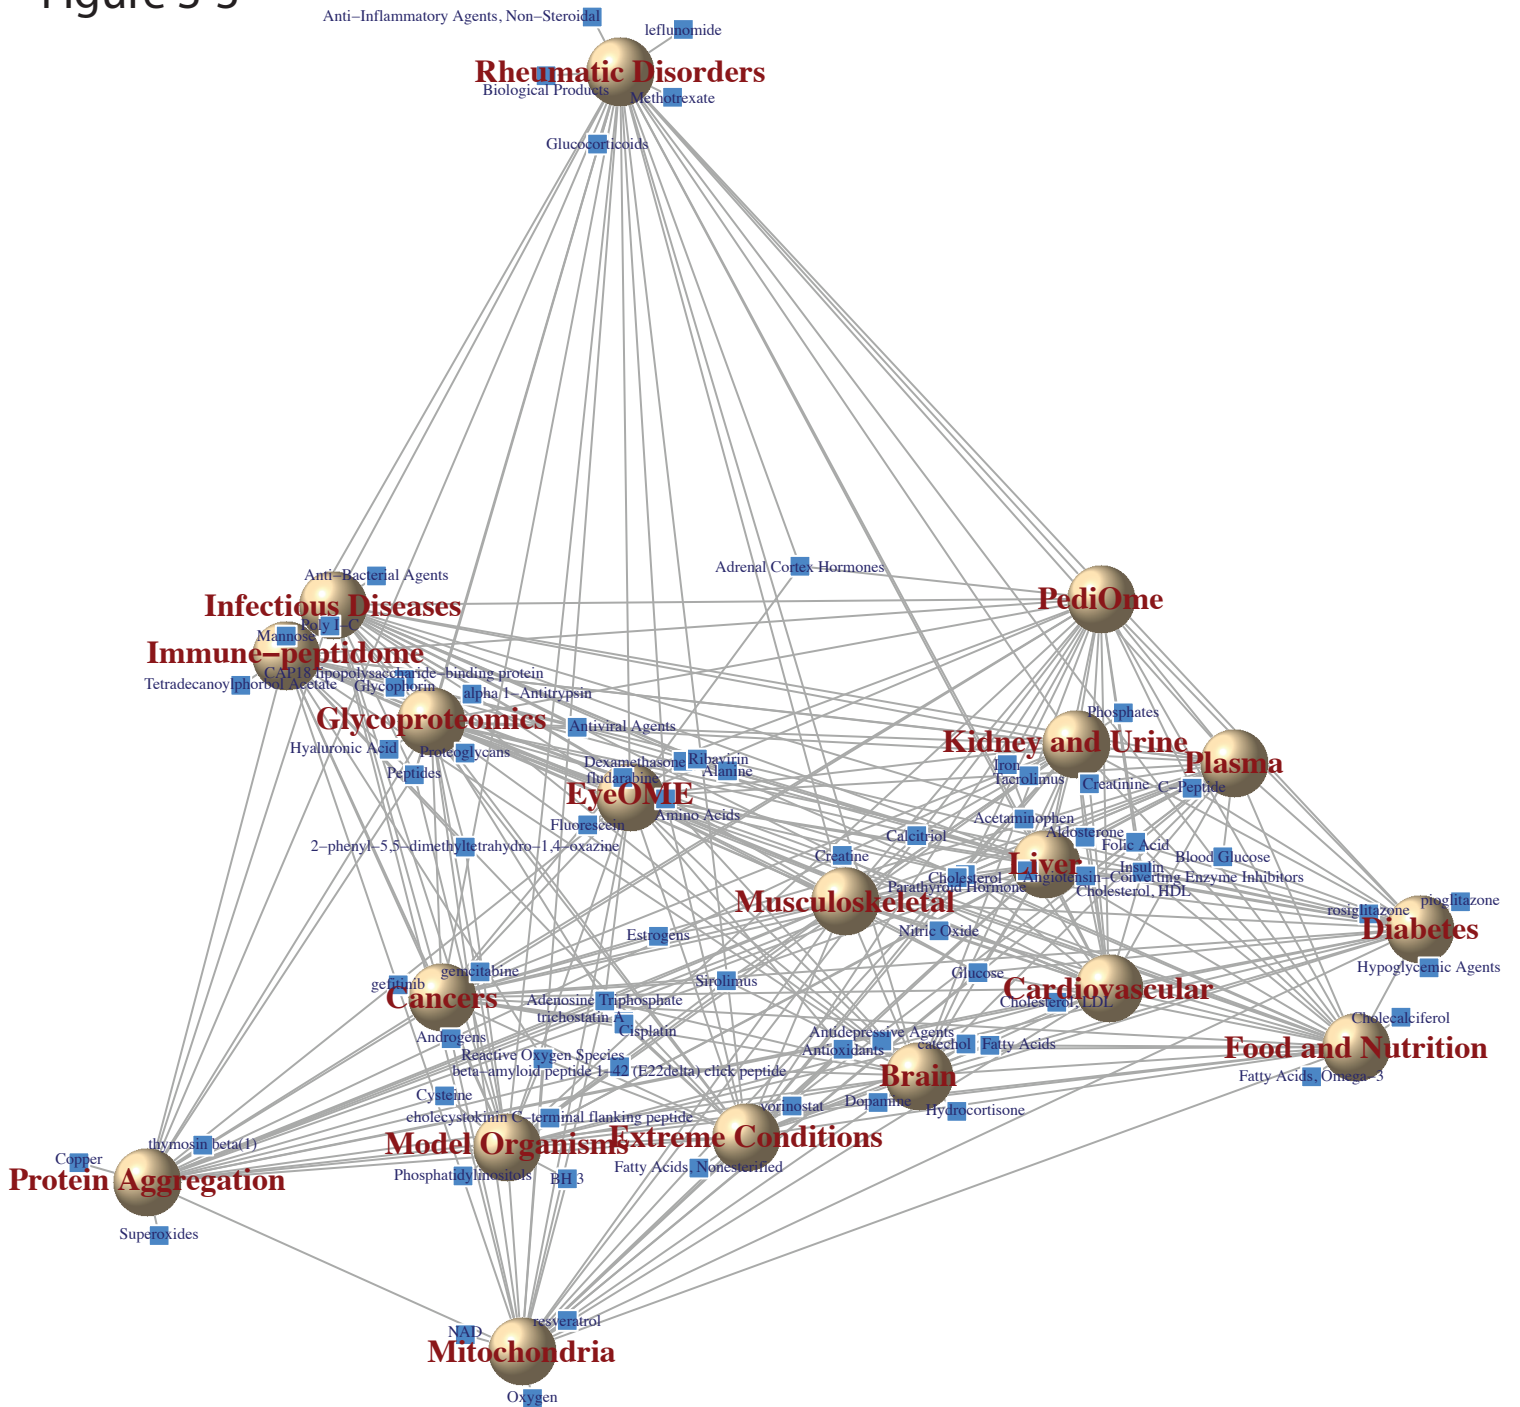

**Table S-1.** The PubMed search terms for the B/D-HPP targeted fields.

| <b>B/D HPP Targeted Fields</b> | <b>PubMed Search Terms</b>                                                        |
|--------------------------------|-----------------------------------------------------------------------------------|
| Brain                          | brain                                                                             |
| Cancers                        | cancer                                                                            |
| Cardiovascular                 | cardiovascular                                                                    |
| Diabetes                       | diabetes                                                                          |
| EyeOME                         | eye OR ocular                                                                     |
| Food and nutrition             | food OR nutrition OR nutrients                                                    |
| Glycoproteomics                | glycoproteins                                                                     |
| Immune-peptidome               | immune OR immune system                                                           |
| Infectious diseases            | infectious OR infection                                                           |
| Kidney and urine               | kidney OR urine                                                                   |
| Liver                          | liver OR hepatic                                                                  |
| Mitochondria                   | mitochondria                                                                      |
| Model organisms                | rat OR mouse                                                                      |
| Musculoskeletal                | muscle OR bone OR musculoskeletal                                                 |
| PediOme                        | pediatric OR newborn OR infant OR toddler OR child OR adolescent                  |
| Plasma                         | plasma OR serum                                                                   |
| Protein aggregation            | protein aggregation NOT platelet aggregation                                      |
| Rheumatic disorders            | rheumatic                                                                         |
| Extreme conditions             | hot OR cold OR alkaline condition OR acidic condition OR hypersaline OR radiation |
